# Supplementary material for: Effect of High-Frequency Stellate Ganglion Block on Sleep and Affective Symptoms in Insomnia Disorder: A Prospective Clinical Study
Source: Research Square preprint supplement (doi:10.21203/rs.3.rs-7627734/v1), 2025-10-28
Supplement: Supplementary file 1 [file 16144bfdecf379ed473e5fb2.docx]

**Table** **S1** The components of PSQI

| Characteristic | T1 | T2 | T3 | T4 |
| --- | --- | --- | --- | --- |
| Subjective sleep quality | 2.53 ± 0.56 | 1.51 ± 0.63 | 1.65 ± 0.70 | 1.79 ± 0.69 |
| Sleep latency | 2.81 ± 0.57 | 2.40 ± 0.74 | 2.33 ± 0.75 | 2.43 ± 0.77 |
| Sleep duration | 2.47 ± 0.75 | 1.58 ± 0.96 | 1.64 ± 0.98 | 1.67 ± 1.01 |
| Habitual sleep efficiency | 2.69 ± 0.66 | 1.79 ± 1.10 | 1.76 ± 1.14 | 1.86 ± 1.08 |
| Sleep disturbances | 1.36 ± 0.54 | 1.14 ± 0.42 | 1.12 ± 0.44 | 1.07 ± 0.35 |
| Use of sleeping medication | 1.67 ± 1.06 | 1.08 ± 1.10 | 1.18 ± 1.09 | 1.24 ± 1.08 |
| Daytime dysfunction | 1.82 ± 0.89 | 1.07 ± 0.95 | 1.04 ± 0.98 | 1.32 ± 1.09 |

Note: Data presented as mean ± SD. T1, baseline; T2, immediately post-intervention; T3, 4-weeks post-intervention; T4, 12-weeks post-intervention.
